# Supplementary material for: Reporting guideline for the early stage clinical evaluation of decision support systems driven by artificial intelligence: DECIDE-AI
Source: PubMed Central journal article supplement — BMJ. 2022 May 18;377:e070904. doi: 10.1136/bmj-2022-070904 (PMC9116198; doi:10.1136/bmj-2022-070904), 2022-05-18
Supplement: vasb070904.ww3.pdf [file vasb070904.ww3.pdf]

# SUPPLEMENTARY MATERIALS

## Reporting guideline for the early-stage clinical evaluation of decision support systems driven by artificial intelligence: DECIDE-AI

Baptiste Vasey, MMed; Myura Nagendran, FFICM; Bruce Campbell, MS; David A. Clifton, DPhil;  
Gary S. Collins, PhD; Spiros Denaxas, PhD; Alastair K. Denniston, PhD; Livia Faes, MD; Bart Geerts, PhD;  
Mudathir Ibrahim, MD; Xiaoxuan Liu, PhD; Bilal A. Mateen, MBBS; Piyush Mathur, MD;  
Melissa D. McCradden, PhD; Lauren Morgan, PhD; Johan Ordish, MA; Campbell Rogers, MD; Suchi Saria, PhD;  
Daniel SW Ting, MD PhD; Peter Watkinson, MD; Wim Weber, MD PhD; Peter Wheatstone;  
Peter McCulloch, MD; and the DECIDE-AI expert group.

### Table of Contents

|                                                                                         |          |
|-----------------------------------------------------------------------------------------|----------|
| <b>SUPPLEMENTARY FIGURES .....</b>                                                      | <b>2</b> |
| Supplementary figure 1 – Item list(s) evolution (overview) .....                        | 2        |
| Supplementary figure 2 – Item list(s) evolution (per item) .....                        | 3        |
| <b>SUPPLEMENTARY TABLES.....</b>                                                        | <b>4</b> |
| Suppl. table 1a – geographical distribution of the Delphi process participants .....    | 4        |
| Suppl. table 1b – Stakeholder group affiliation of the Delphi process participants..... | 4        |
| Suppl. table 2a – geographical distribution of the Consensus Group members.....         | 5        |
| Suppl. table 2b – Stakeholder group affiliation of the Consensus Group members.....     | 5        |
| Suppl. table 3 – Summary of the consensus meeting votes.....                            | 6        |
| <b>SUPPLEMENTARY NOTES.....</b>                                                         | <b>9</b> |
| Suppl. note 1 – Consensus process participants .....                                    | 9        |

# SUPPLEMENTARY FIGURES

Supplementary figure 1 – Item list(s) evolution (overview)

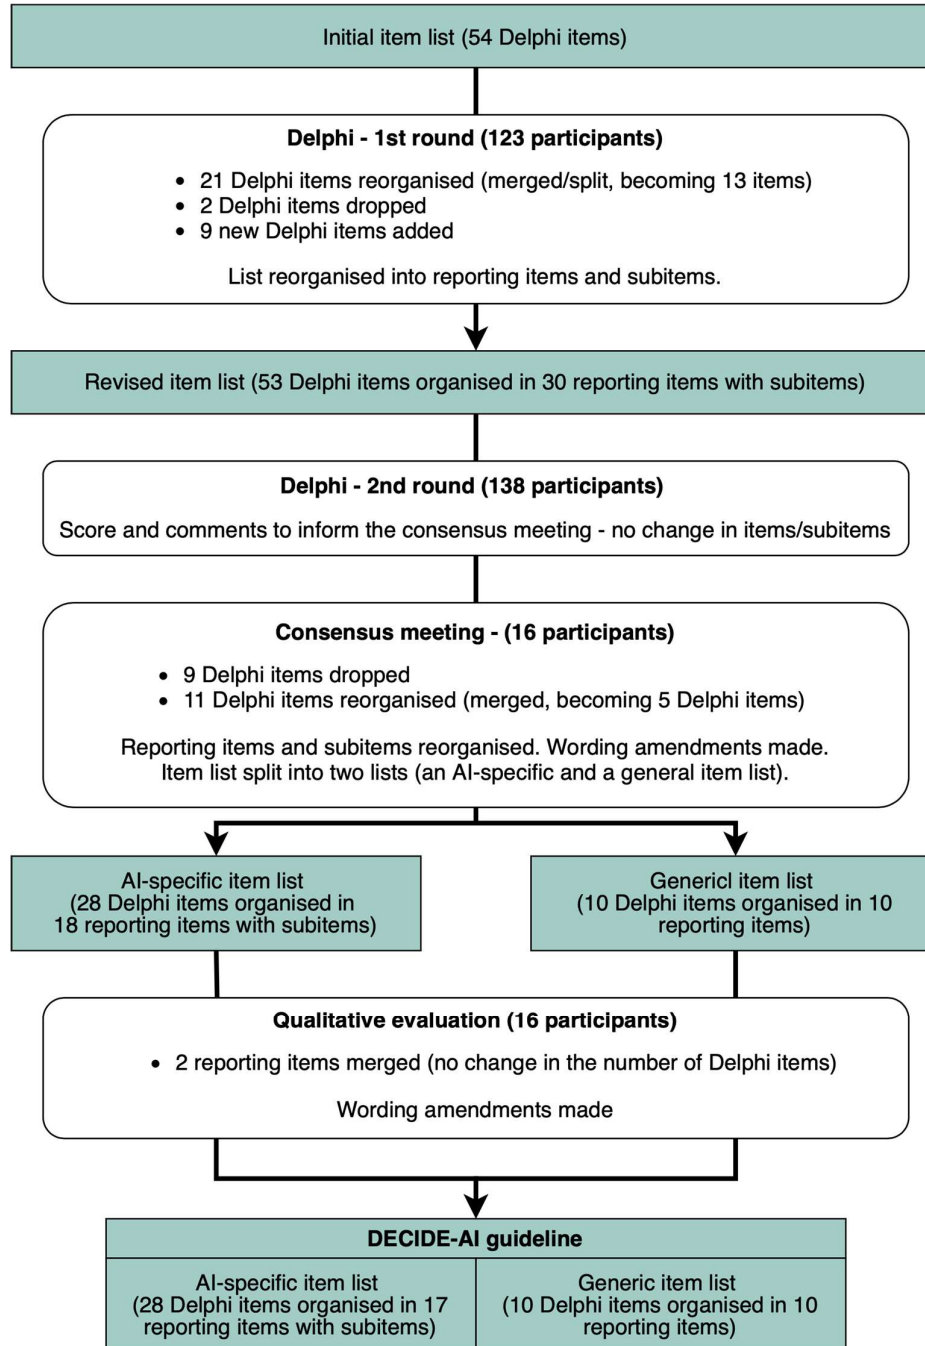

Suppl. figure 1. Graphical representation of the item list(s) evolution during the guideline development process. Delphi items are the recommendations voted on during the Delphi and discussed during the consensus meeting; reporting items are made of one or more Delphi items, organised thematically.

Supplementary figure 2 – Item list(s) evolution (per item)

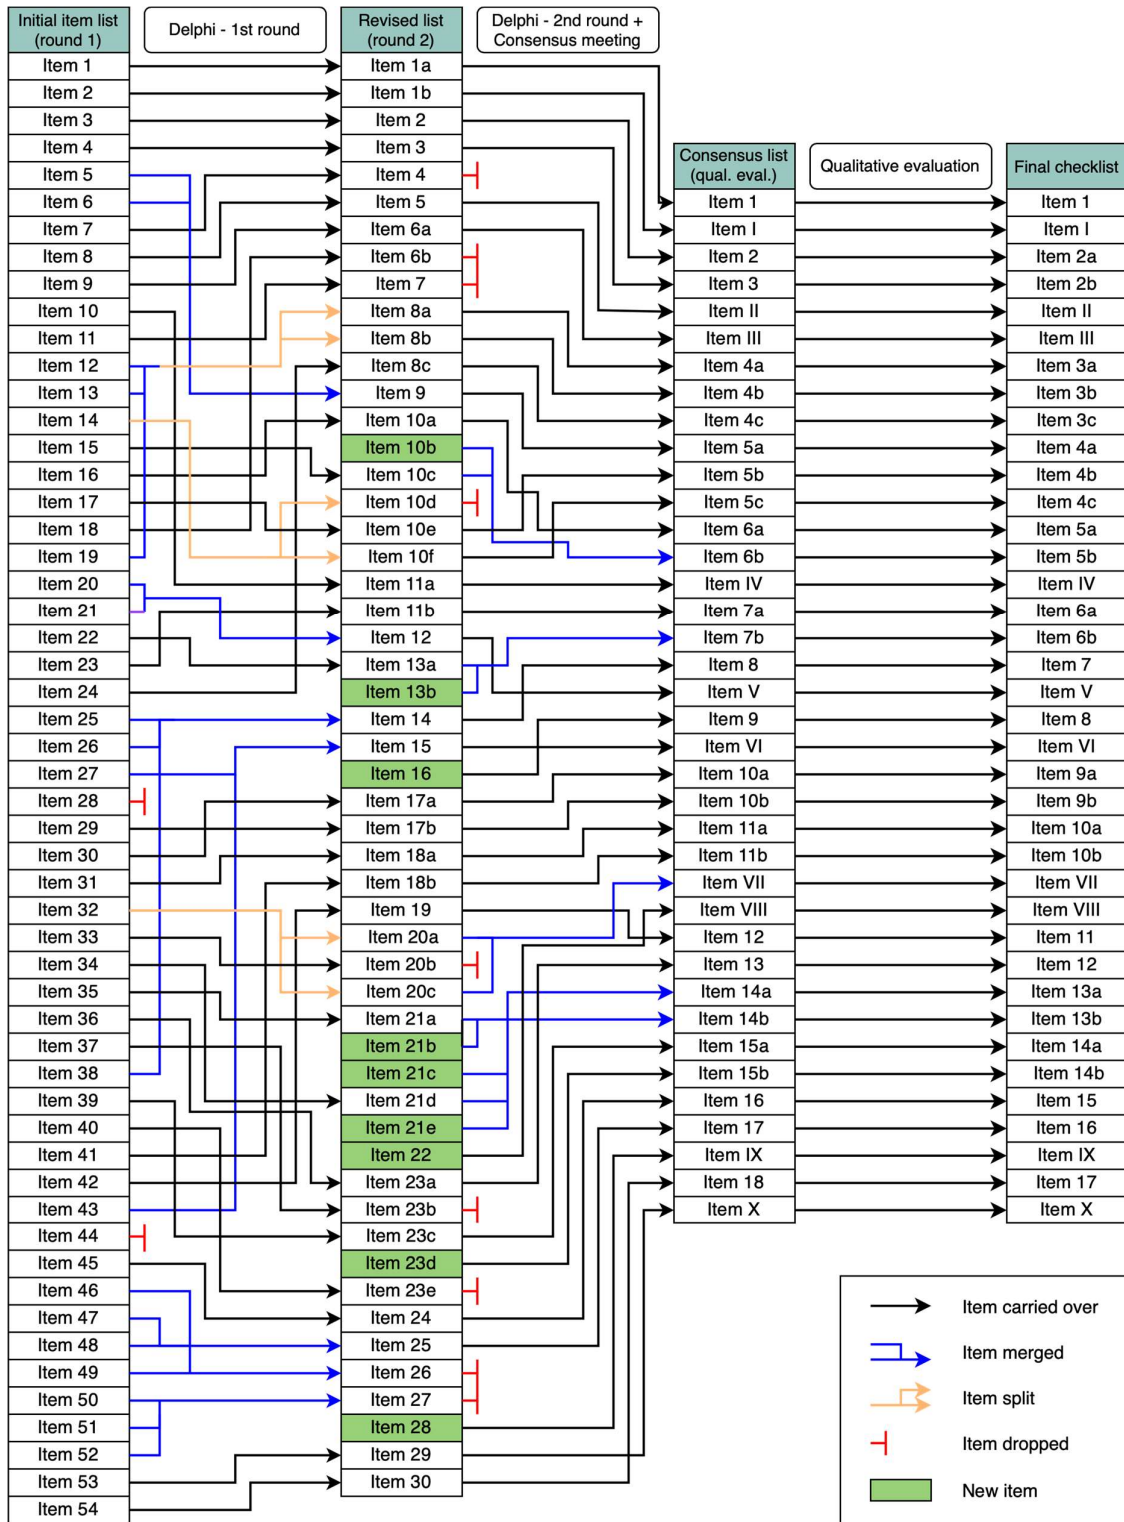

Suppl. figure 2. Detail of the item list(s) evolution, with individual item follow up. For a better graphical representation, the AI-specific item list (Arab numerals) and generic item list (Roman numerals) are merged, as they appear in the checklist.

## SUPPLEMENTARY TABLES

Suppl. table 1a – geographical distribution of the Delphi process participants

| Geographical locations of participants' main working place |                        |                |                        |                   |                        |
|------------------------------------------------------------|------------------------|----------------|------------------------|-------------------|------------------------|
| Country                                                    | Number of participants | Country        | Number of participants | Country           | Number of participants |
| United Kingdom (UK)                                        | 79 (52%)               | Australia (AU) | 3 (2%)                 | Finland (FI)      | 1 (<1%)                |
| United States of America (USA)                             | 24 (16%)               | France (FR)    | 3 (2%)                 | Kenya (KE)        | 1 (<1%)                |
| The Netherlands (NL)                                       | 13 (9%)                | Italy (IT)     | 3 (2%)                 | Portugal (PT)     | 1 (<1%)                |
| Germany (DE)                                               | 7 (5%)                 | Austria (AT)   | 1 (<1%)                | Singapore (SG)    | 1 (<1%)                |
| Canada (CA)                                                | 6 (4%)                 | Belgium (BE)   | 1 (<1%)                | South Africa (SA) | 1 (<1%)                |
| Republic of Korea (KR)                                     | 4 (3%)                 | Brazil (BR)    | 1 (<1%)                | Spain (ES)        | 1 (<1%)                |

**Suppl. table 1a:** Geographical distribution of the Delphi participants' main working place. Total number of participants = 151.

Suppl. table 1b – Stakeholder group affiliation of the Delphi process participants

| Stakeholder group affiliation |                        |                                           |                        |
|-------------------------------|------------------------|-------------------------------------------|------------------------|
| Stakeholder group             | Number of participants | Stakeholder group                         | Number of participants |
| Clinicians                    | 68 (45%)               | Policy makers/official institutions staff | 8 (5%)                 |
| Engineers/Computer scientists | 50 (33%)               | Administrators/hospital management        | 7 (5%)                 |
| Methodologists                | 30 (20%)               | Regulators                                | 7 (5%)                 |
| Statisticians                 | 21 (14%)               | Trialists                                 | 7 (5%)                 |
| Implementation scientists     | 19 (13%)               | Ethicists                                 | 6 (4%)                 |
| Entrepreneurs*                | 15 (10%)               | Private sector representatives*           | 6 (4%)                 |
| Epidemiologists               | 14 (9%)                | Patient representatives                   | 5 (3%)                 |
| Human factors specialists*    | 14 (9%)                | Funders                                   | 3 (2%)                 |
| Journal editors               | 14 (9%)                | Payers/Commissioners                      | 1 (<1%)                |
| Allied health professional    | 10 (7%)                | Psychologists                             | 1 (<1%)                |

**Suppl. table 1b:** Self-reported stakeholder group affiliation of the Delphi participants. Total number of participants = 151, each participant could select multiple stakeholder group affiliation. \*In total, 28 private sector entities of various sizes were represented.

**Suppl. table 2a – geographical distribution of the Consensus Group members**

| Geographical locations of participants' main working place |                        |                      |                        |                |                        |
|------------------------------------------------------------|------------------------|----------------------|------------------------|----------------|------------------------|
| Country                                                    | Number of participants | Country              | Number of participants | Country        | Number of participants |
| United Kingdom (UK)                                        | 9 (56%)                | The Netherlands (NL) | 2 (13%)                | Singapore (SG) | 1 (6%)                 |
| United States of America (USA)                             | 3 (19%)                | Canada (CA)          | 1 (6%)                 |                |                        |

**Suppl. table 2a:** Geographical distribution of the Consensus Group members' main working place. Total number of participants = 16.

**Suppl. table 2b – Stakeholder group affiliation of the Consensus Group members**

| Stakeholder group affiliation |                        |                                           |                        |
|-------------------------------|------------------------|-------------------------------------------|------------------------|
| Stakeholder group             | Number of participants | Stakeholder group                         | Number of participants |
| Clinicians                    | 8 (50%)                | Policy makers/official institutions staff | 2 (13%)                |
| Engineers/Computer scientists | 4 (25%)                | Administrators/hospital management        | 2 (13%)                |
| Methodologists                | 6 (38%)                | Regulators                                | 1 (6%)                 |
| Statisticians                 | 2 (13%)                | Trialists                                 | 1 (6%)                 |
| Implementation scientists     | 2 (13%)                | Ethicists                                 | 1 (6%)                 |
| Entrepreneurs                 | 3 (19%)                | Patient representatives                   | 1 (6%)                 |
| Epidemiologists               | 0 (0%)                 | Private sector representatives            | 1 (6%)                 |
| Human factors specialists     | 2 (13%)                | Funders                                   | 2 (13%)                |
| Journal editors               | 1 (6%)                 | Payers/Commissioners                      | 0 (0%)                 |
| Allied health professional    | 0 (0%)                 | Psychologists                             | 0 (0%)                 |

**Suppl. table 2b:** Stakeholder group affiliation of the Consensus Group members. Total number of participants = 16, each member could be affiliated to more than one stakeholder group.

Suppl. table 3 – Summary of the consensus meeting votes

|            | Delphi               |         | Consensus meeting |                    |                      |         |         | Results                                                                                                                                                                                                                                                                                                                                                                                                                       | Comments/arguments of the Consensus Group |
|------------|----------------------|---------|-------------------|--------------------|----------------------|---------|---------|-------------------------------------------------------------------------------------------------------------------------------------------------------------------------------------------------------------------------------------------------------------------------------------------------------------------------------------------------------------------------------------------------------------------------------|-------------------------------------------|
|            | % participants       | Votes   |                   |                    | % votes <sup>c</sup> |         |         |                                                                                                                                                                                                                                                                                                                                                                                                                               |                                           |
|            | Include <sup>a</sup> | include | exclude           | blank <sup>b</sup> | include              | exclude |         |                                                                                                                                                                                                                                                                                                                                                                                                                               |                                           |
| Item 1a    | 93                   | 15      | 0                 | 1                  | 100                  | 0       | include |                                                                                                                                                                                                                                                                                                                                                                                                                               |                                           |
| Item 1b    | 98                   | 13      | 0                 | 3                  | 100                  | 0       | include |                                                                                                                                                                                                                                                                                                                                                                                                                               |                                           |
| Item 2     | 96                   | 14      | 0                 | 2                  | 100                  | 0       | include |                                                                                                                                                                                                                                                                                                                                                                                                                               |                                           |
| Item 3     | 96                   | 14      | 0                 | 2                  | 100                  | 0       | include |                                                                                                                                                                                                                                                                                                                                                                                                                               |                                           |
| Item 4     | 72                   | 9       | 6                 | 1                  | 60                   | 40      | exclude | There is for the time being no widely accepted development stage nomenclature for clinical AI systems. Although DECIDE-AI was developed to align with current regulatory processes and information about the regulatory context of the AI system would be useful, the overall feeling was to keep the focus of the guideline on scientific evaluation.                                                                        |                                           |
| Item 5     | 99                   | 12      | 2                 | 2                  | 86                   | 14      | include |                                                                                                                                                                                                                                                                                                                                                                                                                               |                                           |
| Item 6a    | 90                   | 12      | 2                 | 2                  | 86                   | 14      | include |                                                                                                                                                                                                                                                                                                                                                                                                                               |                                           |
| Item 6b    | 69                   | 1       | 14                | 1                  | 7                    | 93      | exclude | Issues around patient privacy and data security should already be covered in the ethics application and approval.                                                                                                                                                                                                                                                                                                             |                                           |
| Item 7     | 99                   | 4       | 11                | 1                  | 27                   | 73      | exclude | Although study design is important, it was felt that the wording of the item was too generic and the important aspects of the study design were covered in other items already.                                                                                                                                                                                                                                               |                                           |
| Item 8a    | 93                   | 13      | 0                 | 3                  | 100                  | 0       | include |                                                                                                                                                                                                                                                                                                                                                                                                                               |                                           |
| Item 8b    | 90                   | 13      | 1                 | 2                  | 93                   | 7       | include |                                                                                                                                                                                                                                                                                                                                                                                                                               |                                           |
| Item 8c    | 85                   | 13      | 0                 | 3                  | 100                  | 0       | include |                                                                                                                                                                                                                                                                                                                                                                                                                               |                                           |
| Item 9     | 90                   | 13      | 0                 | 3                  | 100                  | 0       | include |                                                                                                                                                                                                                                                                                                                                                                                                                               |                                           |
| Item 10a   | 95                   | 14      | 0                 | 2                  | 100                  | 0       | include |                                                                                                                                                                                                                                                                                                                                                                                                                               |                                           |
| Item 10b+c | 91 & 93              | 15      | 0                 | 1                  | 100                  | 0       | include |                                                                                                                                                                                                                                                                                                                                                                                                                               |                                           |
| Item 10d   | 73                   | 8       | 6                 | 2                  | 57                   | 43      | exclude | Details about the technical integration of an AI system is better suited to an instruction manual or audit report than a scientific report. Many research teams might not have integrated their AI system with the hospital infrastructure at the early stage of evaluation. If the developers intend to demonstrate some form of generalisability, the AI system evaluation should not be dependent on local IT integration. |                                           |
| Item 10e   | 96                   | 14      | 1                 | 1                  | 93                   | 7       | include |                                                                                                                                                                                                                                                                                                                                                                                                                               |                                           |
| Item 10f   | 97                   | 15      | 0                 | 1                  | 100                  | 0       | include |                                                                                                                                                                                                                                                                                                                                                                                                                               |                                           |
| Item 11a   | 96                   | 14      | 0                 | 2                  | 100                  | 0       | include |                                                                                                                                                                                                                                                                                                                                                                                                                               |                                           |
| Item 11b   | 93                   | 13      | 1                 | 2                  | 93                   | 7       | include |                                                                                                                                                                                                                                                                                                                                                                                                                               |                                           |

|                     |              |    |    |   |     |    |         |                                                                                                                                                                                                                                                                                                                                                                                  |
|---------------------|--------------|----|----|---|-----|----|---------|----------------------------------------------------------------------------------------------------------------------------------------------------------------------------------------------------------------------------------------------------------------------------------------------------------------------------------------------------------------------------------|
| <b>Item 12</b>      | 85           | 14 | 0  | 2 | 100 | 0  | include |                                                                                                                                                                                                                                                                                                                                                                                  |
| <b>Item 13a+b</b>   | 90.4 & 84.2  | 14 | 0  | 2 | 100 | 0  | include |                                                                                                                                                                                                                                                                                                                                                                                  |
| <b>Item 14</b>      | 76           | 11 | 2  | 3 | 85  | 15 | include | Human factors are a core component of any new technology evaluation. A description of the human factors methods used is essential to understand the later reporting of the results.                                                                                                                                                                                              |
| <b>Item 15</b>      | 57           | 13 | 1  | 2 | 93  | 7  | include | A wide range of medical journals and regulatory agencies are increasingly putting an emphasis on patient and public involvement. The overall feeling (including from the patient representative) was that including this item was important for ensuring that patients are recognised as important stakeholders in the future of clinical AI.                                    |
| <b>Item 16</b>      | 62           | 12 | 1  | 3 | 92  | 8  | include | The debate around algorithmic fairness and the ethical use of AI systems is now well-established in the literature. The information reported under this item is important to ensure a transparent appraisal of AI systems with regard to their ethical use of AI.                                                                                                                |
| <b>Item 17a</b>     | 98           | 12 | 1  | 3 | 92  | 8  | include |                                                                                                                                                                                                                                                                                                                                                                                  |
| <b>Item 17b</b>     | 96           | 13 | 0  | 3 | 100 | 0  | include |                                                                                                                                                                                                                                                                                                                                                                                  |
| <b>Item 18a</b>     | 87           | 13 | 1  | 2 | 93  | 7  | include |                                                                                                                                                                                                                                                                                                                                                                                  |
| <b>Item 18b</b>     | 86           | 11 | 2  | 3 | 85  | 15 | include |                                                                                                                                                                                                                                                                                                                                                                                  |
| <b>Item 19</b>      | 89           | 13 | 0  | 3 | 100 | 0  | include |                                                                                                                                                                                                                                                                                                                                                                                  |
| <b>Item 20a+c</b>   | 92 & 91      | 12 | 0  | 4 | 100 | 0  | include |                                                                                                                                                                                                                                                                                                                                                                                  |
| <b>Item 20b</b>     | 74           | 3  | 9  | 4 | 25  | 75 | exclude | Collecting information about the stand-alone algorithm performance is not always practical during clinical evaluation and may distract attention from the focus on the final supported user decisions, which actually influence clinical outcomes.                                                                                                                               |
| <b>Item 21a+b</b>   | 93 & 91      | 13 | 0  | 3 | 100 | 0  | include |                                                                                                                                                                                                                                                                                                                                                                                  |
| <b>Item 21c+d+e</b> | 83 & 97 & 85 | 13 | 0  | 3 | 100 | 0  | include |                                                                                                                                                                                                                                                                                                                                                                                  |
| <b>Item 22</b>      | 78           | 12 | 1  | 3 | 92  | 8  | include |                                                                                                                                                                                                                                                                                                                                                                                  |
| <b>Item 23a</b>     | 93           | 13 | 0  | 3 | 100 | 0  | include |                                                                                                                                                                                                                                                                                                                                                                                  |
| <b>Item 23b</b>     | 55           | 3  | 10 | 3 | 23  | 77 | exclude | Despite the importance of trust (and its evolution) to understand the reaction of users to the AI system outputs (and design large scale evaluation studies), there is currently no commonly accepted way to measure trust in the context of clinical AI.                                                                                                                        |
| <b>Item 23c</b>     | 77           | 14 | 0  | 2 | 100 | 0  | include |                                                                                                                                                                                                                                                                                                                                                                                  |
| <b>Item 23d</b>     | 62           | 12 | 2  | 2 | 86  | 14 | include | Learning curves are important in surgery and well documented in the surgical literature. There are many examples of hard to interpret trials because authors rushed to randomisation before learning how to perform a procedure to the required standard. AI is also a type of complex intervention for which the evaluation is likely to be impacted by similar considerations. |

|                 |    |    |    |   |     |    |         |                                                                                                                                                                                                                                                                                                                                                                                                      |
|-----------------|----|----|----|---|-----|----|---------|------------------------------------------------------------------------------------------------------------------------------------------------------------------------------------------------------------------------------------------------------------------------------------------------------------------------------------------------------------------------------------------------------|
| <b>Item 23e</b> | 67 | 5  | 9  | 2 | 36  | 64 | exclude | Despite the importance of interpretability to gain user and patient trust in the AI system, as well as to interpret the system's outputs in the context of the broader clinical information environment, there is currently no generally accepted way of quantifying or evaluating interpretability. Moreover, the clinical value of an AI system output may be independent of its interpretability. |
| <b>Item 24</b>  | 96 | 14 | 0  | 2 | 100 | 0  | include |                                                                                                                                                                                                                                                                                                                                                                                                      |
| <b>Item 25</b>  | 97 | 12 | 2  | 2 | 86  | 14 | include |                                                                                                                                                                                                                                                                                                                                                                                                      |
| <b>Item 26</b>  | 84 | 10 | 3  | 3 | 77  | 23 | exclude | 'Deviation' implies algorithm superiority, which is not always the case. The guideline should avoid being too prescriptive in the discussion section and focus on the discussion of the main results in the context of the intended use. Discussion of the human factors results should be integrated to those of the main clinical performance results.                                             |
| <b>Item 27</b>  | 78 | 3  | 11 | 2 | 21  | 79 | exclude | This could be out of scope and at risk of being speculative. Scale up is not necessarily the only logical next step; authors might be interested in generalising the results to other settings first. It is better to focus the discussion on the main outcomes and integrate the discussion of the remaining challenges to those of the main clinical performance results.                          |
| <b>Item 28</b>  | 96 | 12 | 2  | 2 | 86  | 14 | include |                                                                                                                                                                                                                                                                                                                                                                                                      |
| <b>Item 29</b>  | 98 | 13 | 1  | 2 | 93  | 7  | include |                                                                                                                                                                                                                                                                                                                                                                                                      |
| <b>Item 30</b>  | 93 | 14 | 0  | 2 | 100 | 0  | include |                                                                                                                                                                                                                                                                                                                                                                                                      |

**Suppl. table 3:** Summary of the consensus meeting vote and results. <sup>a</sup>score  $\geq 7$  was defined as a recommendation to include; <sup>b</sup>including abstentions; <sup>c</sup>only considering non-blank votes.



## SUPPLEMENTARY NOTES

---

### Suppl. notes 1 – Consensus process participants

#### DECIDE-AI Steering Group (n=12)

Alastair K. Denniston (University Hospitals Birmingham NHS Foundation Trust, Birmingham, UK); Baptiste Vasey (Nuffield Department of Surgical Sciences, University of Oxford, Oxford, UK); Bart Geerts (Healthpus.ai BV, Amsterdam, NL); David A. Clifton (Institute of Biomedical Engineering, Department of Engineering Science, University of Oxford, Oxford, UK); Gary S. Collins (Centre for Statistics in Medicine, Nuffield Department of Orthopaedics, Rheumatology & Musculoskeletal Sciences, University of Oxford, Oxford, UK); Lauren Morgan (Morgan Human Systems Ltd, Shrewsbury, UK); Livia Faes (Moorfields Eye Hospital, London, UK); Peter McCulloch (Nuffield Department of Surgical Sciences, University of Oxford, Oxford, UK); Peter Watkinson (Nuffield Department of Clinical Neurosciences, University of Oxford, Oxford, UK); Piyush Mathur (Cleveland Clinic, Cleveland, Ohio, USA); Suchi Saria (Departments of Computer Sciences, Statistics, and health Policy, and Division of Informatics, Johns Hopkins University, Baltimore, MD, USA); Xiaoxuan Liu (University Hospitals Birmingham NHS Foundation Trust, Birmingham, UK);

#### Delphi participants (first and/or second round, n=151)

Aaron Y. Lee (Department of Ophthalmology, School of Medicine, University of Washington, Seattle, WA, USA); Alan G. Fraser (School of Medicine, Cardiff University, Cardiff, UK); Alastair K. Denniston (University Hospitals Birmingham NHS Foundation Trust, Birmingham, UK); Ali Connell (Google Health, London, UK); Alykhan Vira (Quantium Health, Johannesburg, SA); Andre Esteva (Artera Research, Artera, Mountain View, CA, USA); Andrew D. Althouse (University of Pittsburgh, Pittsburgh, PA, USA); Andrew L. Beam (Department of Epidemiology, Harvard T.H. Chan School of Public Health, Boston, MA, USA); Anne de Hond (CAIRElab, Leiden University Medical Centre, Leiden, NL); Anne-Laure Boulesteix (Institute for Medical Information Processing, Biometry and Epidemiology, Ludwig Maximilian University, Munich, DE); Anthony Bradlow (Rheumatology Department, Royal Berkshire Hospital, Reading, UK); Ari Ercole (Cambridge Centre for AI in Medicine, University of Cambridge, Cambridge, UK); Arsenio Paez (Nuffield Department of Primary Care Health Sciences, University of Oxford, Oxford, UK); Athanasios Tsanas (Usher Institute, Edinburgh Medical School, University of Edinburgh, Edinburgh, UK); Baptiste Vasey (Nuffield Department of Surgical Sciences, University of Oxford, Oxford, UK); Barry Kirby (K Sharp, Llanelli, UK); Bart Geerts (Healthpus.ai BV, Amsterdam, NL);

Ben Glocker (Department of Computing, Imperial College London, London, UK); Bilal A. Mateen (The Wellcome Trust, London, UK); Bruce Campbell (University of Exeter Medical School, Exeter, UK); Campbell Rogers (HeartFlow Inc., Redwood City, CA, USA); Carmelo Velardo (Sensyne Health, UK and Department of Engineering Science, University of Oxford, Oxford, UK); Chang Min Park (Seoul National University College of Medicine, Seoul, KR); Charisma Hehakaya (Division of Imaging & Oncology, University Medical Center Utrecht, Utrecht, NL); Chris Baber (University of Birmingham, Birmingham, UK); Chris Paton (Nuffield Department of Medicine, University of Oxford, Oxford, UK); Christian Johner (Johner Institute, Konstanz, DE); Christopher J. Kelly (Google Health, London, UK); Christopher J. Vincent (PDD Group Ltd, London, UK); Christopher Yau (University of Manchester, Manchester, UK); Clare McGenity (Pathology and Data Analytics, University of Leeds, Leeds, UK); Constantine Gatsonis (Department of Biostatistics, Brown University School of Public Health, Providence, RI, USA); Corinne Faivre-Finn (The Christie NHS Foundation Trust, Manchester, UK); Crispin Simon (London School of Economics, London, UK); Cyrus Espinoza (Patient representative); Daniel P. Jenkins (DCA Design, UK); Daniel S.W. Ting (Singapore National Eye Center, Singapore Eye Research Institute, Singapore, SG); Danielle Sent (Department of Medical Informatics, Amsterdam UMC, University of Amsterdam, Amsterdam, NL); Danilo Bzdok (Mila, Quebec Artificial Intelligence Institute, Montreal, CA); Darren Treanor (Leeds Teaching Hospitals NHS Trust, Leeds, UK); David A. Clifton (Institute of Biomedical Engineering, Department of Engineering Science, University of Oxford, Oxford, UK); David C. Wong (Department of Computer Science and Centre for Health Informatics, University of Manchester, Manchester, UK); David F. Steiner (Google Health, Palo Alto, USA); David Higgins (Berlin Institute of Health, Berlin, DE); Dawn Benson (Patient representative); Deborah Morrison (National Institute for Health and Care Excellence, UK); Declan P. O'Regan (MRC London Institute of Medical Sciences, Imperial College London, London, UK); Dominic Danks (Institute of Cancer and Genomic Sciences, University of Birmingham, Birmingham, UK); Emanuele Neri (University of Pisa, Pisa, IT); Evangelia Kyrimi (School of Electronic Engineering and Computer Science (EECS), Queen Mary University of London, London, UK); Falk Schwendicke (Charité Universitätsmedizin Berlin, Berlin, DE); Farah Magrabi (Australian Institute of Health Innovation, Macquarie University, Sydney, AU); Frances Ives (West Midlands Academic Health Science Network, Birmingham, UK); Frank E. Rademakers (Department Cardiovascular sciences, KU Leuven, Leuven, BE); Gary S. Collins (Centre for Statistics in Medicine, Nuffield Department of Orthopaedics, Rheumatology & Musculoskeletal Sciences, University of Oxford, Oxford, UK); George E. Fowler (Bristol Centre for Surgical Research, Department of Population Health Sciences, Bristol Medical School, Bristol, UK); Giuseppe Frau (Deep Blue, Rome, IT); H. D. Jeffry Hogg (Population Health Science Institute, Newcastle University, Newcastle upon Tyne, UK); Hani J. Marcus (Department of Neurosurgery, National Hospital for Neurology and Neurosurgery, Queen Square, London, UK); Heang-Ping Chan (Department of Radiology, University of Michigan, Ann Arbor, MI, USA); Henry Xiang (The

Abigail Wexner Research Institute, Nationwide Children's Hospital, The Ohio State University, Columbus, OH, USA); Hugh F. McIntyre (Department of Medicine, East Sussex Healthcare Trust, Hastings, UK); Hugh Harvey (Hardian Health, UK); Hyungjin Kim (Department of Radiology, Seoul National University Hospital, Seoul, KR); Ibrahim Habli (Department of Computer Science, University of York, York, UK); James C. Fackler (Department of Anesthesiology and Critical Care Medicine, The Johns Hopkins University School of Medicine, Baltimore, MD, USA); James Shaw (Joint Centre for Bioethics, University of Toronto, Toronto, CA); Janet Higham (University of Oxford, Oxford, UK); Jared M. Wohlgemut (Centre for Trauma Sciences, Blizard Institute, Queen Mary University of London, London, UK); Jaron Chong (Medical Imaging, Western University, London, CA); Jean-Emmanuel Bibault (Radiation Oncology Department, Hôpital Européen Georges Pompidou, AP-HP, Paris, FR); Jérémie F. Cohen (Center of Research in Epidemiology and Statistics (Inserm 1153), Université de Paris, Paris, FR); Jesper Kers (Department of Pathology, Amsterdam UMC, University of Amsterdam, Amsterdam, NL); Jessica Morley (Oxford Internet Institute, University of Oxford, Oxford, UK); Joachim Krois (Oral Diagnostics & Digital Health & Health Services Research, Charité Universitätsmedizin Berlin, Berlin, Germany); Joao Monteiro (Nature Medicine, New York, NY, USA); Joel Horovitz (Department of Surgery, Maimonides Medical Center, Brooklyn, NY, USA); Johan Ordish (The Medicines and Healthcare products Regulatory Agency, London, UK); John Fletcher (The BMJ, London, UK); Jonathan Taylor (Nuclear Medicine / 3D Lab, Sheffield Teaching Hospitals, Sheffield, UK); Jung Hyun Yoon (Department of Radiology, Severance Hospital, Yonsei University College of Medicine, Seoul, KR); Karandeep Singh (Department of Learning Health Sciences, University of Michigan Medical School, Ann Arbor, MI, USA); Karel G.M. Moons (Julius Center, UMC Utrecht, Utrecht University, Utrecht, NL); Kassandra Karpathakis (Harvard TH Chan School of Public Health, Boston, MA, USA); Ken Catchpole (Medical University of South Carolina, Charleston, SC, USA); Kerenza Hood (Centre for Trials Research, Cardiff University, Cardiff, UK); Konstantinos Balaskas (Moorfields Ophthalmic Reading Centre and Clinical AI Hub, Moorfields Eye Hospital, London, UK); Konstantinos Kamnitsas (School of Computer Science, University of Birmingham, Birmingham, UK); Laura Militello (Applied Decision Science LLC, USA); Laure Wynants (Department of Epidemiology, CAPHRI Care and Public Health Research Institute, Maastricht University, Maastricht, NL); Lauren Morgan (Morgan Human Systems Ltd, Shrewsbury, UK); Livia Faes (Moorfields Eye Hospital, London, UK); Luc J.M. Smits (Department of Epidemiology, Maastricht University, Maastricht, NL); Ludwig C. Hinske (Institute for Biomedical Information Processing, Biometry and Epidemiology, Ludwig-Maximilians-University Munich, Munich, DE); Luke Oakden-Rayner (Australian Institute for Machine Learning, University of Adelaide, Adelaide, AU); M. Khair ElZarrad (U.S. Food and Drug Administration)<sup>§</sup>; Maarten van Smeden (Julius Center for Health Sciences and Primary Care,

---

<sup>§</sup> Participation represents personal views and perspectives that may not necessarily reflect the positions and opinions of the U.S. FDA.

University Medical Center Utrecht, Utrecht University, Utrecht, NL); Mara Giavina-Bianchi (Hospital Israelita Albert Einstein, São Paulo, BR); Mark Daley (The University of Western Ontario, London, CA); Mark P. Sendak (Duke Institute for Health Innovation, Durham, USA); Mark Sujan (Human Factors Everywhere Ltd, Woking, UK); Maroeska Rovers (Department of Operating rooms, Radboudumc, Nijmegen, NL); Matthew DeCamp (University of Colorado, Boulder, CO, USA); Matthieu Komorowski (Dept of Surgery and Cancer, Imperial College London, London, UK); Max Marsden (Centre for Trauma Science, Blizard Institute, Queen Mary University of London, London, UK); Maxine Mackintosh (Genomics England, Queen Mary University of London, London, United Kingdom); Melissa D. McCradden (The Hospital for Sick Children, Toronto, CA); Michael D. Abramoff (University of Iowa, Iowa City, IA, USA); Miguel Ángel Armengol de la Hoz (Big Data Department, FPS, Regional Ministry of Health of Southern Spain, ES); Myura Nagendran (UKRI Centre for Doctoral Training in AI for Healthcare, Imperial College London, London, UK); Neale Hambidge (National Hospital for Neurology and Neurosurgery, Queen Square, London, UK); Neil Daly (Skin Analytics, London, UK); Niels Peek (Division of Informatics, Imaging and Data Science, The University of Manchester, Manchester, UK); Oliver Redfern (Kadoorie Centre for Critical Care Research and Education, Nuffield Department of Clinical Neurosciences, University of Oxford, Oxford, UK); Omer F. Ahmad (Wellcome/EPSRC centre for Interventional & Surgical Sciences (WEISS), University College London, London, UK); Patrick M. Bossuyt (Amsterdam University Medical Centers, University of Amsterdam, Amsterdam, NL); Pearse A. Keane (Institute of Ophthalmology, University College London, London, UK); Pedro N.P. Ferreira (CENTEC - IST, University of Lisbon, Lisbon, PT); Peter McCulloch (Nuffield Department of Surgical Sciences, University of Oxford, Oxford, UK); Peter Watkinson (Nuffield Department of Clinical Neurosciences, University of Oxford, Oxford, UK); Peter Wheatstone (Patient representative); Petra Schnell-Inderst (Institut of Public Health, Medical Decision Making and HTA, UMIT - University for Health Sciences, Medical Informatics and Technology, Hall i. T., AT); Pietro Mascagni (Gastrointestinal Endoscopic Surgery, Fondazione Policlinico Universitario A. Gemelli IRCCS, Rome, IT); Piyush Mathur (Cleveland Clinic, Cleveland, Ohio, USA); Prokar Dasgupta (King's Health Partners Academic Surgery, King's College London, London, UK); Pujun Guan (Graduate School of Biomedical Sciences, University of Texas MD Anderson Cancer Center and UTHealth, Houston, USA); Rawen Kader (Division of Surgery and Interventional Sciences, University College London, London, UK); Reena Chopra (Google Health, London, UK); Ritse M. Mann (Department of medical imaging, Radboud University Medical Center, Nijmegen, NL); Rupa Sarkar (The Lancet Digital Health, The Lancet Group, London, UK); Saana M. Mäenpää (Department of Neurosurgery, Helsinki University Hospital, Helsinki, FI); Samuel G. Finlayson (Harvard Medical School, Boston, MA, USA); Sarah Vollam (Nuffield Department of Clinical Neurosciences, University of Oxford, Oxford, UK); Sean P. White (NHS England, UK); Sebastian J. Vollmer (Data Science and its Application, DFKI, Kaiserslautern, DE); Seong Ho Park (Department of Radiology,

Asan Medical Center, Seoul, KR); Shakir Laher (University of York, York, UK); Shalmali Joshi (SEAS, Harvard University, Cambridge, MA, USA); Spiros Denaxas (Institute of Health Informatics, University College London, London, UK); Suchi Saria (Departments of Computer Sciences, Statistics, and health Policy, and Division of Informatics, Johns Hopkins University, Baltimore, MD, USA); Susan C. Shelmerdine (Department of Clinical Radiology, Great Ormond Street Hospital for Children NHS Foundation Trust, London, UK); Tom J.W. Stocker (PUBLIC Ltd, Oxford, UK); Valentina Giannini (University of Turin, Turin, IT); Valerie Keston-Hole (Patient representative); Vince I. Madai (QUEST Centre for Responsible Research, Berlin Institute of Health, Charité Universitätsmedizin Berlin, Berlin, Germany); Virginia Newcombe (University Division of Anaesthesia, Department of Medicine, University of Cambridge, Cambridge, UK); Wendy A. Rogers (Philosophy Department and School of Medicine, Macquarie University, Sydney, AU); William Ogallo (IBM Research Africa, Nairobi, KE); Wim Weber (The BMJ, London, UK); Xiaoxuan Liu (University Hospitals Birmingham NHS Foundation Trust, Birmingham, UK); Zane B. Perkins (Centre for Trauma Sciences, Queen Mary University of London, London, UK).

#### **Consensus meeting participants (n=16+3)**

##### *With voting rights (n=16):*

Baptiste Vasey (Nuffield Department of Surgical Sciences, University of Oxford, Oxford, UK); Bart Geerts (Healthpus.ai BV, Amsterdam, NL); Bilal A. Mateen (The Wellcome Trust, London, UK); Campbell Rogers (HeartFlow Inc., Redwood City, CA, USA); Daniel S.W. Ting (Singapore National Eye Center, Singapore Eye Research Institute, Singapore, SG); Gary S. Collins (Centre for Statistics in Medicine, Nuffield Department of Orthopaedics, Rheumatology & Musculoskeletal Sciences, University of Oxford, Oxford, UK); Johan Ordish (The Medicines and Healthcare products Regulatory Agency, London, UK); Lauren Morgan (Morgan Human Systems Ltd, Shrewsbury, UK); Melissa D. McCradden (The Hospital for Sick Children, Toronto, CA); Peter McCulloch (Nuffield Department of Surgical Sciences, University of Oxford, Oxford, UK); Peter Wheatstone (Patient representative); Piyush Mathur (Cleveland Clinic, Cleveland, Ohio, USA); Spiros Denaxas (Institute of Health Informatics, University College London, London, UK); Suchi Saria (Departments of Computer Sciences, Statistics, and health Policy, and Division of Informatics, Johns Hopkins University, Baltimore, MD, USA); Wim Weber (The BMJ, London, UK); Xiaoxuan Liu (University Hospitals Birmingham NHS Foundation Trust, Birmingham, UK);

##### *Chair (n=1):*

Bruce Campbell (University of Exeter Medical School, Exeter, UK)

##### *Observers (n=2):*

Myura Nagendran (Imperial College London, London, UK), Livia Faes (Moorfields Eye Hospital, London, UK)

### **Experts participating in the qualitative evaluation (n=16)**

Ali Connell (Google Health, London, UK); Dinesh V. Gunasekaran (Singapore National Eye Center, Singapore Eye Research Institute, Singapore, SG); Falk Schwendicke (Charité Universitätsmedizin Berlin, Berlin, DE); Hani J. Marcus (Department of Neurosurgery, National Hospital for Neurology and Neurosurgery, Queen Square, London, UK); Jean-Emmanuel Bibault (Radiation Oncology Department, Hôpital Européen Georges Pompidou, AP-HP, Paris, FR); Laurence B. Lovat (University College London, London, UK); Lisa Baker (Mima, London, UK); Mara Giavina-Bianchi (Hospital Israelita Albert Einstein, São Paulo, BR); Matthew Woodward (THIS Institute, School of Clinical Medicine, University of Cambridge, Cambridge, UK); Oliver Redfern (Kadoorie Centre for Critical Care Research and Education, Nuffield Department of Clinical Neurosciences, University of Oxford, Oxford, UK); Omer F. Ahmad (Wellcome/EPSRC centre for Interventional & Surgical Sciences (WEISS), University College London, London, UK); Rachel Barnett (Healthplus.ai B.V., Amsterdam, NL); Siri L. van der Meijden (Healthplus.ai B.V., Amsterdam, NL and Leiden University Medical Center, Leiden, NL); Tien-En Tan (Singapore National Eye Center, Singapore Eye Research Institute, Singapore, SG); Wei Yan Ng (Singapore National Eye Center, Singapore Eye Research Institute, Singapore, SG); Yoonyoung Park (Center for Computational Health, IBM Research, Cambridge, MA USA).
