# Supplementary material for: Reporting guideline for the early stage clinical evaluation of decision support systems driven by artificial intelligence: DECIDE-AI
Source: PubMed Central journal article supplement — BMJ. 2022 May 18;377:e070904. doi: 10.1136/bmj-2022-070904 (PMC9116198; doi:10.1136/bmj-2022-070904), 2022-05-18
Supplement: vasb070904.ww4.pdf [file vasb070904.ww4.pdf]

## Consortium

### The DECIDE-AI expert group

Baptiste Vasey<sup>1,2,3</sup>; Myura Nagendran<sup>4</sup>; Bruce Campbell<sup>5,6</sup>; David A Clifton<sup>2</sup>; Gary S Collins<sup>7</sup>; Spiros Denaxas<sup>8,9,10,11</sup>; Alastair K Denniston<sup>12,13,14</sup>; Livia Faes<sup>14</sup>; Bart Geerts<sup>15</sup>; Mudathir Ibrahim<sup>1,16</sup>; Xiaoxuan Liu<sup>12,13</sup>; Bilal A Mateen<sup>8,17,18</sup>; Piyush Mathur<sup>19</sup>; Melissa D McCradden<sup>20,21</sup>; Lauren Morgan<sup>22</sup>; Johan Ordish<sup>23</sup>; Campbell Rogers<sup>24</sup>; Suchi Saria<sup>25,26</sup>; Daniel SW Ting<sup>27,28</sup>; Peter Watkinson<sup>3,29</sup>; Wim Weber<sup>30</sup>; Peter Wheatstone<sup>31</sup>; Peter McCulloch<sup>1</sup>; Aaron Y Lee<sup>32</sup>; Alan G Fraser<sup>33</sup>; Alastair K Denniston<sup>12,13,14</sup>; Ali Connell<sup>34</sup>; Alykhan Vira<sup>35</sup>; Andre Esteva<sup>36</sup>; Andrew D Althouse<sup>37</sup>; Andrew L Beam<sup>38</sup>; Anne de Hond<sup>39</sup>; Anne-Laure Boulesteix<sup>40</sup>; Anthony Bradlow<sup>41</sup>; Ari Ercole<sup>42</sup>; Arsenio Paez<sup>43</sup>; Athanasios Tsanas<sup>44</sup>; Baptiste Vasey<sup>1,2,3</sup>; Barry Kirby<sup>45</sup>; Bart Geerts<sup>15</sup>; Ben Glocker<sup>46</sup>; Bilal A Mateen<sup>8,17,18</sup>; Bruce Campbell<sup>5,6</sup>; Campbell Rogers<sup>24</sup>; Carmelo Velardo<sup>2,4,7</sup>; Chang Min Park<sup>48</sup>; Charisma Hehakaya<sup>49</sup>; Chris Baber<sup>50</sup>; Chris Paton<sup>51</sup>; Christian Johner<sup>52</sup>; Christopher J Kelly<sup>34</sup>; Christopher J Vincent<sup>53</sup>; Christopher Yau<sup>54</sup>; Clare McGenity<sup>55</sup>; Constantine Gatsonis<sup>56</sup>; Corinne Faivre-Finn<sup>57</sup>; Crispin Simon<sup>58</sup>; Daniel SW Ting<sup>27,28</sup>; Danielle Sent<sup>59</sup>; Danilo Bzdok<sup>60</sup>; Darren Treanor<sup>61</sup>; David A Clifton<sup>2</sup>; David C Wong<sup>62</sup>; David F Steiner<sup>63</sup>; David Higgins<sup>64</sup>; Dawn Benson<sup>65</sup>; Declan P O'Regan<sup>66</sup>; Dinesh V Gunasekaran<sup>27</sup>; Dominic Danks<sup>67</sup>; Emanuele Neri<sup>68</sup>; Evangelia Kyrimi<sup>69</sup>; Falk Schwendicke<sup>70</sup>; Farah Magrabi<sup>71</sup>; Frances Ives<sup>72</sup>; Frank E Rademakers<sup>73</sup>; Gary S Collins<sup>7</sup>; George E Fowler<sup>74</sup>; Giuseppe Frau<sup>75</sup>; H D Jeffrey Hogg<sup>76</sup>; Hani J Marcus<sup>77</sup>; Heang-Ping Chan<sup>78</sup>; Henry Xiang<sup>79</sup>; Hugh F McIntyre<sup>80</sup>; Hugh Harvey<sup>81</sup>; Hyungjin Kim<sup>82</sup>; Ibrahim Habli<sup>83</sup>; James C Fackler<sup>84</sup>; James Shaw<sup>85</sup>; Janet Higham<sup>86</sup>; Jared M Wohlgemut<sup>87</sup>; Jaron Chong<sup>88</sup>; Jean-Emmanuel Bibault<sup>89</sup>; Jérémie F Cohen<sup>90</sup>; Jesper Kers<sup>91</sup>; Jessica Morley<sup>92</sup>; Joachim Krois<sup>93</sup>; Joao Monteiro<sup>94</sup>; Joel Horovitz<sup>16</sup>; Johan Ordish<sup>23</sup>; John Fletcher<sup>30</sup>; Jonathan Taylor<sup>95</sup>; Jung Hyun Yoon<sup>96</sup>; Karandeep Singh<sup>97</sup>; Karel GM Moons<sup>98</sup>; Kassandra Karpathakis<sup>99</sup>; Ken Catchpole<sup>100</sup>; Kerenza Hood<sup>101</sup>; Konstantinos Balaskas<sup>102</sup>; Konstantinos Kamnitsas<sup>50</sup>; Laura Militello<sup>103</sup>; Laure Wynants<sup>104</sup>; Lauren Morgan<sup>22</sup>; Lauren Oakden-Rayner<sup>105</sup>; Laurence B Lovat<sup>106</sup>; Livia Faes<sup>14</sup>; Luc JM Smits<sup>107</sup>; Ludwig C Hinske<sup>108</sup>; M Khair ElZarrad<sup>109\*</sup>; Maarten van Smeden<sup>110</sup>; Mara Giavina-Bianchi<sup>111</sup>; Mark Daley<sup>112</sup>; Mark P Sendak<sup>113</sup>; Mark Suján<sup>114</sup>; Maroeska Rovers<sup>115</sup>; Matthew DeCamp<sup>116</sup>; Matthew Woodward<sup>117</sup>; Matthieu Komorowski<sup>118</sup>; Max Marsden<sup>87</sup>; Maxine Mackintosh<sup>119</sup>; Melissa D McCradden<sup>20,21</sup>; Michael D Abramoff<sup>120</sup>; Miguel Ángel Armengol de la Hoz<sup>121</sup>; Myura Nagendran<sup>4</sup>; Neale Hambidge<sup>122</sup>; Neil Daly<sup>123</sup>; Niels Peek<sup>124</sup>; Oliver Redfern<sup>125</sup>; Omer F Ahmad<sup>126</sup>; Patrick M Bossuyt<sup>127</sup>; Pearse A Keane<sup>128</sup>; Pedro NP Ferreira<sup>129</sup>; Peter McCulloch<sup>1</sup>; Peter Watkinson<sup>3,29</sup>; Peter Wheatstone<sup>31</sup>; Petra Schnell-Inderst<sup>130</sup>; Pietro Mascagni<sup>131</sup>; Piyush Mathur<sup>19</sup>; Prokar Dasgupta<sup>132</sup>; Pujun Guan<sup>133</sup>; Rachel Barnett<sup>15</sup>; Rawen Kader<sup>134</sup>; Reena Chopra<sup>34</sup>; Ritse M Mann<sup>135</sup>; Rupa Sarkar<sup>136</sup>; Saana M Mäenpää<sup>137</sup>; Samuel G Finlayson<sup>138</sup>; Sarah Vollam<sup>3</sup>; Sebastian J Vollmer<sup>139</sup>; Seong Ho Park<sup>140</sup>; Shakir Laher<sup>141</sup>; Shalmali Joshi<sup>142</sup>; Siri L van der Meijden<sup>15,143</sup>; Spiros Denaxas<sup>8,9,10,11</sup>; Suchi Saria<sup>25,26</sup>; Susan C Shelmerdine<sup>144</sup>; Tien-En Tan<sup>27</sup>; Tom JW Stocker<sup>145</sup>; Valentina Giannini<sup>146</sup>; Vince I Madai<sup>147</sup>; Virginia Newcombe<sup>148</sup>; Wei Yan Ng<sup>27</sup>; Wendy A Rogers<sup>149</sup>; William Ogallo<sup>150</sup>; Wim Weber<sup>30</sup>; Xiaoxuan Liu<sup>12,13</sup>; Yoonyoung Park<sup>151</sup>; Zane B Perkins<sup>87</sup>

<sup>1</sup> Nuffield Department of Surgical Sciences, University of Oxford, Oxford, UK

<sup>2</sup> Institute of Biomedical Engineering, Department of Engineering Science, University of Oxford, Oxford, UK

<sup>3</sup> Critical Care Research Group, Nuffield Department of Clinical Neurosciences, University of Oxford, Oxford, UK

- <sup>4</sup> UKRI Centre for Doctoral Training in AI for Healthcare, Imperial College London, London, UK
- <sup>5</sup> University of Exeter Medical School, Exeter, UK
- <sup>6</sup> Royal Devon and Exeter Hospital, Exeter, UK
- <sup>7</sup> Centre for Statistics in Medicine, Nuffield Department of Orthopaedics, Rheumatology and Musculoskeletal Sciences, University of Oxford, Oxford, UK
- <sup>8</sup> Institute of Health Informatics, University College London, London, UK
- <sup>9</sup> British Heart Foundation Data Science Centre, London, UK
- <sup>10</sup> Health Data Research UK, London, UK
- <sup>11</sup> UCL Hospitals Biomedical Research Centre, London, UK
- <sup>12</sup> University Hospitals Birmingham NHS Foundation Trust, Birmingham, UK
- <sup>13</sup> Academic Unit of Ophthalmology, Institute of Inflammation and Ageing, College of Medical and Dental Sciences, University of Birmingham, UK
- <sup>14</sup> Moorfields Eye Hospital NHS Foundation Trust, London, UK
- <sup>15</sup> Healthplus.ai-R&D, Amsterdam, Netherlands
- <sup>16</sup> Department of Surgery, Maimonides Medical Center, Brooklyn, NY, NY, USA
- <sup>17</sup> The Wellcome Trust, London, UK
- <sup>18</sup> The Alan Turing Institute, London, UK
- <sup>19</sup> Department of General Anesthesiology, Anesthesiology Institute, Cleveland Clinic, OH, USA
- <sup>20</sup> The Hospital for Sick Children, Toronto, Canada
- <sup>21</sup> Dalla Lana School of Public Health, University of Toronto, Canada
- <sup>22</sup> Morgan Human Systems, Shrewsbury, UK
- <sup>23</sup> The Medicines and Healthcare products Regulatory Agency, London, UK
- <sup>24</sup> HeartFlow, Redwood City, CA, USA
- <sup>25</sup> Departments of Computer Science, Statistics, and Health Policy, and Division of Informatics, Johns Hopkins University, Baltimore, MD, USA
- <sup>26</sup> Bayesian Health, New York, NY, USA
- <sup>27</sup> Singapore National Eye Center, Singapore Eye Research Institute, Singapore
- <sup>28</sup> Duke-NUS Medical School, National University of Singapore, Singapore
- <sup>29</sup> NIHR Biomedical Research Centre Oxford, Oxford University Hospitals NHS Trust, Oxford, UK
- <sup>30</sup> The BMJ, London, UK
- <sup>31</sup> School of Medicine, University of Leeds, Leeds, UK
- <sup>32</sup> Department of Ophthalmology, School of Medicine, University of Washington, Seattle, WA, USA
- <sup>33</sup> School of Medicine, Cardiff University, Cardiff, UK

- <sup>34</sup> Google Health, London, UK
- <sup>35</sup> Quantum Health, Johannesburg, South Africa
- <sup>36</sup> Artera Research, Artera, Mountain View, CA, USA
- <sup>37</sup> University of Pittsburgh, Pittsburgh, PA, USA
- <sup>38</sup> Department of Epidemiology, Harvard T.H. Chan School of Public Health, Boston, MA, USA
- <sup>39</sup> CAIRElab, Leiden University Medical Centre, Leiden, Netherlands
- <sup>40</sup> Institute for Medical Information Processing, Biometry and Epidemiology, Ludwig Maximilian University, Munich, Germany
- <sup>41</sup> Rheumatology Department, Royal Berkshire Hospital, Reading, UK
- <sup>42</sup> Cambridge Centre for AI in Medicine, University of Cambridge, Cambridge, UK
- <sup>43</sup> Nuffield Department of Primary Care Health Sciences, University of Oxford, Oxford, UK
- <sup>44</sup> Usher Institute, Edinburgh Medical School, University of Edinburgh, Edinburgh, UK
- <sup>45</sup> K Sharp, Llanelli, UK
- <sup>46</sup> Department of Computing, Imperial College London, London, UK
- <sup>47</sup> Sensyne Health, UK
- <sup>48</sup> Seoul National University College of Medicine, Seoul, Korea
- <sup>49</sup> Division of Imaging & Oncology, University Medical Center Utrecht, Utrecht, Netherlands
- <sup>50</sup> School of Computer Science, University of Birmingham, Birmingham, UK
- <sup>51</sup> Nuffield Department of Medicine, University of Oxford, Oxford, UK
- <sup>52</sup> Johner Institute, Konstanz, Germany
- <sup>53</sup> PDD Group Ltd, London, UK
- <sup>54</sup> University of Manchester, Manchester, UK
- <sup>55</sup> Pathology and Data Analytics, University of Leeds, Leeds, UK
- <sup>56</sup> Department of Biostatistics, Brown University School of Public Health, Providence, RI, USA
- <sup>57</sup> The Christie NHS Foundation Trust, Manchester, UK
- <sup>58</sup> London School of Economics, London, UK
- <sup>59</sup> Department of Medical Informatics, Amsterdam UMC, University of Amsterdam, Amsterdam, Netherlands
- <sup>60</sup> Mila, Quebec Artificial Intelligence Institute, Montreal, Canada
- <sup>61</sup> Leeds Teaching Hospitals NHS Trust, Leeds, UK
- <sup>62</sup> Department of Computer Science and Centre for Health Informatics, University of Manchester, Manchester, UK
- <sup>63</sup> Google Health, Palo Alto, USA
- <sup>64</sup> Berlin Institute of Health, Berlin, Germany
- <sup>65</sup> Healthcare Safety Investigation Branch, Farnborough, UK

- <sup>66</sup> MRC London Institute of Medical Sciences, Imperial College London, London, UK
- <sup>67</sup> Institute of Cancer and Genomic Sciences, University of Birmingham, Birmingham, UK
- <sup>68</sup> University of Pisa, Pisa, Italy
- <sup>69</sup> School of Electronic Engineering and Computer Science (EECS), Queen Mary University of London, London, UK
- <sup>70</sup> Charité Universitätsmedizin Berlin, Berlin, Germany
- <sup>71</sup> Australian Institute of Health Innovation, Macquarie University, Sydney, Australia
- <sup>72</sup> West Midlands Academic Health Science Network, Birmingham, UK
- <sup>73</sup> Department Cardiovascular sciences, KU Leuven, Leuven, Belgium
- <sup>74</sup> Bristol Centre for Surgical Research, Department of Population Health Sciences, Bristol Medical School, Bristol, UK
- <sup>75</sup> Deep Blue, Rome, Italy
- <sup>76</sup> Population Health Science Institute, Newcastle University, Newcastle upon Tyne, UK
- <sup>77</sup> Department of Neurosurgery, National Hospital for Neurology and Neurosurgery, Queen Square, London, UK
- <sup>78</sup> Department of Radiology, University of Michigan, Ann Arbor, MI, USA
- <sup>79</sup> The Abigail Wexner Research Institute, Nationwide Children's Hospital, The Ohio State University, Columbus, OH, USA
- <sup>80</sup> Department of Medicine, East Sussex Healthcare Trust, Hastings, UK
- <sup>81</sup> Hardian Health, UK
- <sup>82</sup> Department of Radiology, Seoul National University Hospital, Seoul, Korea
- <sup>83</sup> Department of Computer Science, University of York, York, UK
- <sup>84</sup> Department of Anesthesiology and Critical Care Medicine, The Johns Hopkins University School of Medicine, Baltimore, MD, USA
- <sup>85</sup> Joint Centre for Bioethics, University of Toronto, Toronto, Canada
- <sup>86</sup> University of Oxford, Oxford, UK
- <sup>87</sup> Centre for Trauma Sciences, Blizard Institute, Queen Mary University of London, London, UK
- <sup>88</sup> Medical Imaging, Western University, London, Canada
- <sup>89</sup> Radiation Oncology Department, Hôpital Européen Georges Pompidou, AP-HP, Paris, France
- <sup>90</sup> Center of Research in Epidemiology and Statistics (Inserm 1153), Université de Paris, Paris, France
- <sup>91</sup> Department of Pathology, Amsterdam UMC, University of Amsterdam, Amsterdam, Netherlands
- <sup>92</sup> Oxford Internet Institute, University of Oxford, Oxford, UK
- <sup>93</sup> Oral Diagnostics & Digital Health & Health Services Research, Charité Universitätsmedizin Berlin, Berlin, Germany

- <sup>94</sup> Nature Medicine, New York, NY, USA
- <sup>95</sup> Nuclear Medicine / 3D Lab, Sheffield Teaching Hospitals, Sheffield, UK
- <sup>96</sup> Department of Radiology, Severance Hospital, Yonsei University College of Medicine, Seoul, Korea
- <sup>97</sup> Department of Learning Health Sciences, University of Michigan Medical School, Ann Arbor, MI, USA
- <sup>98</sup> Julius Center, UMC Utrecht, Utrecht University, Utrecht, Netherlands
- <sup>99</sup> Harvard TH Chan School of Public Health, Boston, MA, USA
- <sup>100</sup> Medical University of South Carolina, Charleston, SC, USA
- <sup>101</sup> Centre for Trials Research, Cardiff University, Cardiff, UK
- <sup>102</sup> Moorfields Ophthalmic Reading Centre and Clinical AI Hub, Moorfields Eye Hospital, London, UK
- <sup>103</sup> Applied Decision Science LLC, USA
- <sup>104</sup> Department of Epidemiology, CAPHRI Care and Public Health Research Institute, Maastricht University, Maastricht, Netherlands
- <sup>105</sup> Australian Institute of Machine Learning, University of Adelaide, Adelaide, Australia
- <sup>106</sup> University College London, London, UK
- <sup>107</sup> Department of Epidemiology, Maastricht University, Maastricht, Netherlands
- <sup>108</sup> Institute for Biomedical Information Processing, Biometry and Epidemiology, Ludwig-Maximilians-University Munich, Munich, Germany
- <sup>109</sup> US Food and Drug Administration
- <sup>110</sup> Julius Center for Health Sciences and Primary Care, University Medical Center Utrecht, Utrecht University, Utrecht, Netherlands
- <sup>111</sup> Hospital Israelita Albert Einstein, São Paulo, Brazil
- <sup>112</sup> The University of Western Ontario, London, Canada
- <sup>113</sup> Duke Institute for Health Innovation, Durham, USA
- <sup>114</sup> Human Factors Everywhere Ltd, Woking, UK
- <sup>115</sup> Department of Operating rooms, Radboudumc, Nijmegen, Netherlands
- <sup>116</sup> University of Colorado, Boulder, CO, USA
- <sup>117</sup> THIS Institute, School of Clinical Medicine, University of Cambridge, Cambridge, UK
- <sup>118</sup> Dept of Surgery and Cancer, Imperial College London, London, UK
- <sup>119</sup> Genomics England, Queen Mary University of London, London, UK
- <sup>120</sup> University of Iowa, Iowa City, IA, USA
- <sup>121</sup> Big Data Department, FPS, Regional Ministry of Health of Southern Spain
- <sup>122</sup> National Hospital for Neurology and Neurosurgery, Queen Square, London, UK
- <sup>123</sup> Skin Analytics, London, UK

- <sup>124</sup> Division of Informatics, Imaging and Data Science, The University of Manchester, Manchester, UK
- <sup>125</sup> Kadoorie Centre for Critical Care Research and Education, Nuffield Department of Clinical Neurosciences, University of Oxford, Oxford, UK
- <sup>126</sup> Wellcome/EPSRC centre for Interventional & Surgical Sciences (WEISS), University College London, London, UK
- <sup>127</sup> Amsterdam University Medical Centers, University of Amsterdam, Amsterdam, Netherlands
- <sup>128</sup> Institute of Ophthalmology, University College London, London, UK
- <sup>129</sup> CENTEC - IST, University of Lisbon, Lisbon, Portugal
- <sup>130</sup> Institute of Public Health, Medical Decision Making and HTA, UMIT - University for Health Sciences, Medical Informatics and Technology, UMIT Tyrol, Austria
- <sup>131</sup> Gastrointestinal Endoscopic Surgery, Fondazione Policlinico Universitario A. Gemelli IRCCS, Rome, Italy
- <sup>132</sup> King's Health Partners Academic Surgery, King's College London, London, UK
- <sup>133</sup> Graduate School of Biomedical Sciences, University of Texas MD Anderson Cancer Center and UTHealth, Houston, USA
- <sup>134</sup> Division of Surgery and Interventional Sciences, University College London, London, UK
- <sup>135</sup> Department of medical imaging, Radboud University Medical Center, Nijmegen, Netherlands
- <sup>136</sup> The Lancet Digital Health, The Lancet Group, London, UK
- <sup>137</sup> Department of Neurosurgery, Helsinki University Hospital, Helsinki, Finland
- <sup>138</sup> Harvard Medical School, Boston, MA, USA
- <sup>139</sup> Data Science and its Application, DFKI, Kaiserslautern, Germany
- <sup>140</sup> Department of Radiology, Asan Medical Center, Seoul, Korea
- <sup>141</sup> University of York, York, UK
- <sup>142</sup> SEAS, Harvard University, Cambridge, MA, USA
- <sup>143</sup> Leiden University Medical Center, Leiden, Netherlands
- <sup>144</sup> Department of Clinical Radiology, Great Ormond Street Hospital for Children NHS Foundation Trust, London, UK
- <sup>145</sup> PUBLIC ltd, Oxford, UK
- <sup>146</sup> University of Turin, Turin, Italy
- <sup>147</sup> QUEST Centre for Responsible Research, Berlin Institute of Health, Charité Universitätsmedizin Berlin, Berlin, Germany
- <sup>148</sup> University Division of Anaesthesia, Department of Medicine, University of Cambridge, Cambridge, UK
- <sup>149</sup> Philosophy Department and School of Medicine, Macquarie University, Sydney, Australia
- <sup>150</sup> IBM Research Africa, Nairobi, Kenya

<sup>151</sup> Center for Computational Health, IBM Research, Cambridge, MA USA

\*Participation represents personal views and perspectives that may not necessarily reflect the positions and opinions of the US Food and Drug Administration.
